# Supplementary material for: Stromal fibroblasts induce metastatic tumor cell clusters via epithelial–mesenchymal plasticity
Source: Life Sci Alliance. 2019 Jul 22;2(4):e201900425. doi: 10.26508/lsa.201900425 (PMC6653778; doi:10.26508/lsa.201900425)
Supplement: Supplementary file 25 [file LSA-2019-00425_TableS1.xlsx]

## Sheet: S1
Supplementary Table S1, related to Figure 3. CIMS
CIMS
A2ML1	DKK1	LINC00973	PRDM1	SPRR3
ARL14	FAM83A	MMP1	RAB11FIP1	TERT
C10orf10	FOXQ1	MMP10	RAP1A	TGM2
CAPN14	FYB	MMP28	RHOF	TMCC3
CCDC71L	GPR115	NRP1	SCEL
CD55	HBEGF	NT5E	SERPINB1
CEACAM5	IL13RA2	PAQR5	SERPINB2
CEACAM6	IL1A	PKIB	SERPINB3
CPM	IL1B	PLAU	SLAMF7
DAPK1	IL1RN	PNLIPRP3	SPRR1A
