# Supplementary material for: Stromal fibroblasts induce metastatic tumor cell clusters via epithelial–mesenchymal plasticity
Source: Life Sci Alliance. 2019 Jul 22;2(4):e201900425. doi: 10.26508/lsa.201900425 (PMC6653778; doi:10.26508/lsa.201900425)
Supplement: Supplementary file 27 [file LSA-2019-00425_TableS2.xlsx]

## Sheet: S2
Supplementary Table S2, related to Figure 9. Associations between CEACAM6-positivity in breast cancer tissues and patients' characteristics (n=257)
		Total	Positive expression	Negative expression	P-value Positive vs Negative
		n = 257	n = 93	n = 164
Age at diagnosis (years)
	< 65	195	75	120	0.2248
	68-85	62	18	44
ER/PR status
	Negative	75	29	46	0.6687
	Positive	182	64	118
HER-2 and ER/PR status
	HER-2 (+) and ER/PR(-)	31	19	12	0.0027*
	Others	226	74	152
pT factor
	T1	92	23	69	0.0066*
	T2-T3	165	70	95
pN factor
	N0	149	51	98	0.5111
	N1-N2	108	42	66
	*P < 0.05 (Fisher's exact test)
