# Supplementary material for: Stromal fibroblasts induce metastatic tumor cell clusters via epithelial–mesenchymal plasticity
Source: Life Sci Alliance. 2019 Jul 22;2(4):e201900425. doi: 10.26508/lsa.201900425 (PMC6653778; doi:10.26508/lsa.201900425)
Supplement: Supplementary file 31 [file LSA-2019-00425_TableS6.xlsx]

## Sheet: S6
Supplementary Table S6, related to Materials and Methods. Oligonucleotide sequences.
Primer sequences for real-time PCR
Name	Forward	Reverse
CEACAM6	5’-GCATGTCCCCTGGAAGGA-3’	5’-CGCCTTTGTACCAGCTGTAA-3’
CEACAM5	5’-TCCAGAACTCAGTGAGTGCAAAC-3’	5’-CTCCCGAAAGGTAAGACGAGTC-3’
E-cadherin	5’-TGCCCAGAAAATGAAAAAGG-3’	5’-GTGTATGTGGCAATGCGTTC-3’
GAPDH	5’-ACCCAGAAGACTGTGGATGG-3’	5’-TCTAGACGGCAGGTCAGGTC-3’
β-actin	5’-CGCGAGAAGATGACCCAGA-3’	5’-GAGTCCATCACGATGCCAGT-3’
Src	5’-AAGCTGTTCGGAGGCTTCAA-3’	5’-CTGAGCGAGTGGGCCAGCCA-3’
SDF-1α	5’-TGAGAGCTCGCTTTGAGTGA-3’	5’-CACCAGGACCTTCTGTGGAT-3’
SDF-1β	5’-CTAGTCAAGTGCGTCCACGA-3’	5’-GGACACACCACAGCACAAAC-3’
TGF-β1	5’-ACTGCAAGTGGACATCAACG-3’	5’-TGCGGAAGTCAATGTACAGC-3’
TGF-β2	5’-TTGACGTCTCAGCAATGGAG-3’	5’-GGGTTCTGCAAACGAAAGAC-3’
ZEB1	5’-AGCAGTGAAAGAGAAGGGAATGC-3’	5’-GGTCCTCTTCAGGTGCCTCAG-3’
Primer sequences for DNA methylation by pyrosequencing
Name	Forward	Reverse
CEACAM6 (108bp)	5'-GGATTTTAGGGATTTTTTGTGTGGTG-3'	5'-TATTTAAACCCCTATTCCATAACAAAAC-3'
CEACAM5 (92bp)	5'-AGGGGATAGAGGATATTTGAATAAAGA-3'	5'-CCTCTACCCTAAATCTCTTCCTAAAA-3'
E-cadherin (128bp)	5'-GTTGTGGTCGGTAGGTGAATTTTTAG-3'	5'-CGCAAACTCACAAATACTTTACAATTC-3'
Name	Sequence
CEACAM6 sequence primer	5'-TTAGATATAGTAGAGGTT-3'
CEACAM5 sequence primer	5'-AAGATTATATTTATGATTTA-3'
E-cadherin sequence primer	5'-GAATTTTTAGTTAATTAG-3'
Targeting sequences for shRNA
Name	shRNA1	shRNA2
E-cadherin	5’-ACCGATCAGAATGACAACAAG-3’	5’-CGGGACAACGTTTATTACTAT-3’
Src	5’-CTTAGACCTGAGGGACCCTTC-3’	5’-TGTTCGGAGGCTTCAACTCCT-3’
CEACAM6	5’-CCCAGAATCGTATTGGTTACA-3’	5’-CCCTCCTAATAGTCATACTAG-3’
CEACAM5	5’-CGCCAAATAATAACGGGACCT-3’	5’-CAGCAAGCTACAAATGTGAAA-3’
CXCR4	5’-ATGGATTGGTCATCCTGGTCA-3’	5’-ATCCTGGCCTTCATCAGTCTG-3’
TβR-II	5’-GAATGACGAGAACATAACACT-3’	5’-GATTCAAGAGTATTCTCACTT-3’
ZEB1	5’-CGGCGCAATAACGTTACAAAT-3’	5’-GCTGTTGTTCTGCCAACAGTT-3’
