# Supplementary material for: Stromal fibroblasts induce metastatic tumor cell clusters via epithelial–mesenchymal plasticity
Source: Life Sci Alliance. 2019 Jul 22;2(4):e201900425. doi: 10.26508/lsa.201900425 (PMC6653778; doi:10.26508/lsa.201900425)
Supplement: Supplementary file 32 [file LSA-2019-00425_TableS7.xlsx]

## Sheet: S7
Supplementary Table S7, related to Materials and Methods. Key Resources (Antibodies, Recombinant proteins and Software and Algorithms).
Antibodies
Name		Company	Catalog Number
Alexa 488 rat monoclonal anti-E-cadherin (clone DECMA-1)		Rolf Kemler lab	N/A
Alexa 647 mouse monoclonal anti-ZEB1(clone 2A8A6)		Novus Biologicals	Cat#NBP2-23484AF647
Mouse monoclonal anti-a-SMA (clone 1A4)		Dako	Cat#M0851
Mouse monoclonal anti-a-tubulin (clone B-5-1-2)		Sigma-Aldrich	Cat#T5618
Rabbit monoclonal anti-b-actin (clone13E5)		Cell Signaling Technology	Cat#4970
Mouse monoclonal anti-CEACAM5 (clone COL-1)		Neo Markers	Cat#MS-613-P0
Mouse monoclonal anti-CEACAM5 (clone COL-1)		Thermo Fisher Scientific	Cat#MA5-13714
Rabbit polyclonal anti-CEACAM5		Thermo Fisher Scientific	Cat#PA5-16665
Mouse monoclonal anti-CEACAM6 (clone 9A6)		Santa Cruz	Cat#sc-59899
Rabbit monoclonal anti-c-PARP (clone D64E10)		Cell Signaling Technology	Cat#5625
Mouse monoclonal anti-E-cadherin (clone NCH-38)		Dako	Cat#IR059
Mouse monoclonal anti-E-cadherin (clone 36)		BD Biosciences	Cat#610181
Rabbit monoclonal anti-E-cadherin (clone EP700Y)		Abcam	Cat#ab40772
Mouse monoclonal anti-Fibronectin (clone 10)		BD Biosciences	Cat#610078
Mouse monoclonal anti-GAPDH (clone 6C5)		Santa Cruz	Cat#sc-32233
Rabbit polyclonal anti-HER2		Dako	Cat#A0485
Mouse monoclonal anti-Ki67 (clone MIB1)		Dako	Cat#M7240
Rabbit monoclonal anti-Phosphor-Src (Try416) (clone D49G4)		Cell Signaling Technology	Cat#6943
Rabbit polyclonal anti-Phosphor-Src (Try418)		Abcam	Cat#ab4816
Mouse monoclonal anti-p63 (clone 4A4)		Millipore	Cat#MAB4135
Rabbit monoclonal anti-Src (clone 36D10)		Cell Signaling Technology	Cat#2109
Rabbit monoclonal anti-Src (clone 32G6)		Cell Signaling Technology	Cat#2123
Mouse monoclonal anti-vimentin (clone V9)		Dako	Cat#M0725
Rabbit polyclonal anti-ZEB-1		Sigma-Aldrich	Cat#HPA027524
Mouse monoclonal anti-ZEB-1 (clone H-3)		Santa Cruz	Cat#sc-515797
Recombinant Proteins
Name		Company	Catalog Number
Recombinant human SDF-1		R＆D systems	Cat#P48061
Recombinant human TGF-b1		R＆D systems	Cat#P01137
PP1 (analog)		Calbiochem	Cat#529579
Saracatinib		Selleck	Cat#A10108
Commercial Assays
Name		Company	Catalog Number
IncuCyte® Caspase-3/7 Green Apoptosis Assay Reagent		Essen BioScience	Cat#4440
WT-Ovation Pico RNA Amplification system		NuGEN	Cat#3300-12
FL-Ovation cDNA Biotin Module v2		NuGEN	Cat#4200-60
GeneChip™ Human Genome U133 Plus 2.0 Arrays		Affymetrix	Cat#900466
EpiTect Bisulfite Kit		Qiagen	Cat#59104/59110
Duolink In Situ/Fluorescence		Sigma-Aldrich	DUO92007
Software and Algorithms
Name	Company	URL
FlowJo v10 software	Tree Star, Inc.	https://www.flowjo.com/
Image LabTM Software	Bio Rad	http://www.bio-rad.com/en-bo/product/image-lab-software?ID=KRE6P5E8Z
Aqua Cosmos 2.6	Hamamatsu Photonics	N/A
KM plotter	N/A	http://kmplot.com/analysis
IncuCyte ZOOM® Software	Essen BioScience	https://www.essenbioscience.com/en/products/software/
MiSigDB	Broad Institute	http://www.broadinstitute.org/gsea/msigdb/
R statistical software (version 3.4.3)	N/A	https://www.r-project.org/
ImageJ image analysis program	NIH	https://imagej.net/Downloads
PyroMark Assay Designing Software 2.0	Qiagen	Cat#9019077
cell profiler cell image analysis software	Broad Institute	http://cellprofiler.org/
